# Supplementary material
Source: HighWire-hosted journal article supplement (https://bmjopen.bmj.com/content/12/7/e051568)
Supplement: inline-supplementary-material-1 [file inline-supplementary-material-1.pdf]

**Supplementary Table S1.** Search strategy

| <b>PubMed</b>       |           | <b>Search strategy</b>                                                                                                | <b>Numbers</b> |
|---------------------|-----------|-----------------------------------------------------------------------------------------------------------------------|----------------|
| <b>P</b>            | <b>#1</b> | (((((thyroid cancer) OR (thyroid carcinoma)) OR (thyroid tumor)) OR (papillary thyroid cancer)) OR (thyroid neoplasm) | 94,066         |
|                     | <b>#2</b> | (cervical lymph node) OR (neck lymph node)                                                                            | 38,156         |
|                     | <b>#3</b> | #1 AND #2                                                                                                             | 5436           |
| <b>Intervention</b> | <b>#4</b> | (metastasis) OR (metastatic)                                                                                          | 1,436,116      |
|                     | <b>#5</b> | #3 AND #4                                                                                                             | 4005           |
|                     | <b>#6</b> | ((ultrasonography) OR (ultrasound)) OR (US)                                                                           | 2,497,831      |
|                     | <b>#7</b> | (computed tomography) OR (CT)                                                                                         | 876,390        |
|                     | <b>#8</b> | #6 AND #7                                                                                                             | 449,815        |
| <b>P+I</b>          | <b>#9</b> | #5 AND #8                                                                                                             | 317            |

| <b>Embase</b> |           | <b>Search strategy</b>                                                                                         | <b>Numbers</b> |
|---------------|-----------|----------------------------------------------------------------------------------------------------------------|----------------|
| <b>P</b>      | <b>#1</b> | 'thyroid cancer' OR 'thyroid carcinoma' OR 'thyroid tumor' OR 'papillary thyroid cancer' OR 'thyroid neoplasm' | 88,150         |

|     |           |                                            |           |
|-----|-----------|--------------------------------------------|-----------|
|     | <b>#2</b> | 'cervical lymph node' OR 'neck lymph node' | 18,642    |
|     | <b>#3</b> | #1 AND #2                                  | 3260      |
|     | <b>#4</b> | 'metastasis' OR 'metastatic'               | 954,603   |
|     | <b>#5</b> | #3 AND #4                                  | 2772      |
| I   | <b>#6</b> | 'ultrasonography' OR 'ultrasound' OR 'us'  | 1,451,034 |
|     | <b>#7</b> | 'computed tomography' OR 'ct'              | 1,235,000 |
|     | <b>#8</b> | #6 AND #7                                  | 133,587   |
| P+I | <b>#9</b> | #5 AND #8                                  | 486       |
