# Supplementary material
Source: HighWire-hosted journal article supplement (https://bmjopen.bmj.com/content/12/7/e051568)
Supplement: inline-supplementary-material-3 [file inline-supplementary-material-3.pdf]

Yang J, *et al.* *BMJ Open* 2022; 12:e051568. doi: 10.1136/bmjopen-2021-051568
